# Supplementary material for: Phytosulfokine-α Controls Hypocotyl Length and Cell Expansion in Arabidopsis thaliana through Phytosulfokine Receptor 1
Source: PubMed Central journal article supplement (PMC3116886; doi:10.1371/journal.pone.0021054), 2011-06-16

## Supporting Information S1

**Table S1. Cell lengths and cell numbers in hypocotyls of wt, *pskr1-2*, *pskr1-3*, and *pskr2-1*.** Hypocotyl cell lengths of 20 five-day-old etiolated seedlings each were analyzed from wt, *pskr1-2*, *pskr1-3* and *pskr2-1* at each cell position (data set from Figure 1C). ‘\*’ and ‘°’ indicate significantly different values (\* $P < 0.05$ , ° $P < 0.001$ , 2-sample  $t$ -test). Hypocotyl lengths ( $\pm$ SE) were calculated by adding average cell lengths from each cell position. Total cell numbers are not statistically different between genotypes ( $P < 0.05$ , Tukey test).

| Cell position         | Cell length [ $\mu$ m] |                |                |                |
|-----------------------|------------------------|----------------|----------------|----------------|
|                       | wt                     | <i>pskr1-2</i> | <i>pskr1-3</i> | <i>pskr2-1</i> |
| 1                     | 186.6                  | 194.0          | 146.1          | 176.3          |
| 2                     | 271.0                  | 275.7          | 215.2          | 288.4          |
| 3                     | 382.4                  | 291.3*         | 263.6*         | 354.2          |
| 4                     | 434.4                  | 371.9          | 287.3*         | 410.3          |
| 5                     | 497.4                  | 470.2          | 322.7*         | 462.0          |
| 6                     | 564.5                  | 459.5*         | 363.2*         | 503.0          |
| 7                     | 586.2                  | 482.1*         | 370.2*         | 506.1          |
| 8                     | 614.1                  | 597.0          | 414.1°         | 580.3          |
| 9                     | 680.8                  | 640.3          | 478.4*         | 581.2          |
| 10                    | 702.9                  | 726.7          | 485.0*         | 697.5          |
| 11                    | 847.7                  | 721.8          | 530.1*         | 786.6          |
| 12                    | 927.9                  | 707.3*         | 538.2*         | 750.9          |
| 13                    | 900.3                  | 551.3*         | 524.4*         | 729.4*         |
| 14                    | 770.8                  | 512.7*         | 522.7*         | 744.9          |
| 15                    | 613.5                  | 266.9°         | 529.3          | 699.5          |
| 16                    | 351.7                  | 213.6          | 392.1          | 470.6          |
| 17                    | 204.1                  | 172.6          | 277.4          | 306.7          |
| 18                    | 148.2                  | 116.9          | 190.8          | 214.8          |
| 19                    | 85.7                   | 116.7          | 114.0          | 166.8          |
| 20                    | 55.8                   | -              | -              | 151.8          |
| Hypocotyl length [mm] | 9.8 $\pm$ 0.2          | 7.9 $\pm$ 0.2  | 6.9 $\pm$ 0.2  | 9.6 $\pm$ 0.1  |
| Total cell number     | 19.6 $\pm$ 0.3         | 18.8 $\pm$ 0.3 | 19.0 $\pm$ 0.2 | 20.3 $\pm$ 0.3 |

**Figure S1. Time course of hypocotyl elongation of wt, *pskr1-2*, *pskr1-3*, and *pskr2-1* seedlings.** Hypocotyl lengths of 5-, 10-, 15-, 20- and 25-day-old etiolated seedlings were analyzed for wt, *pskr1-2*, *pskr1-3* and *pskr2-1*. Results are averages of hypocotyl lengths ( $\pm$  SE) of a minimum of 36 hypocotyls analyzed per genotype in two independent biological experiments. Error bars are smaller than the symbols used. Hypocotyl lengths of wt and *pskr2-1* are not significant different, whereas hypocotyl lengths of *pskr1-2* and *pskr1-3* seedlings are significant different to wt at each time point ( $P < 0.001$ , 2-sample *t*-test).

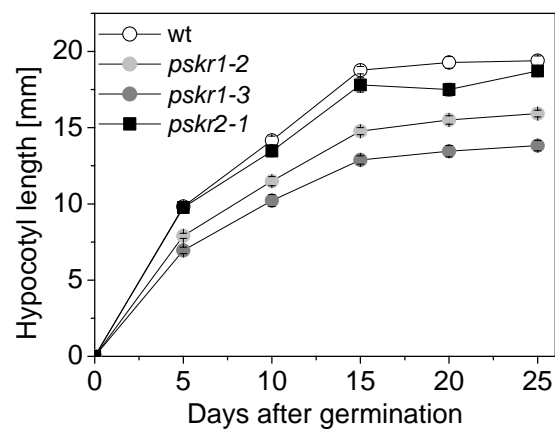

**Figure S2. *t*-test of hypocotyl cell lengths of the allelic lines *pskr1-2* and *pskr1-3*.**

Hypocotyl cell lengths of 5-day-old etiolated seedlings were compared for *pskr1-2* and *pskr1-3* at each cell position (data set from Figure 1C, Table S1). Asterisks indicate significantly different values ( $P < 0.05$ , 2-sample *t*-test).

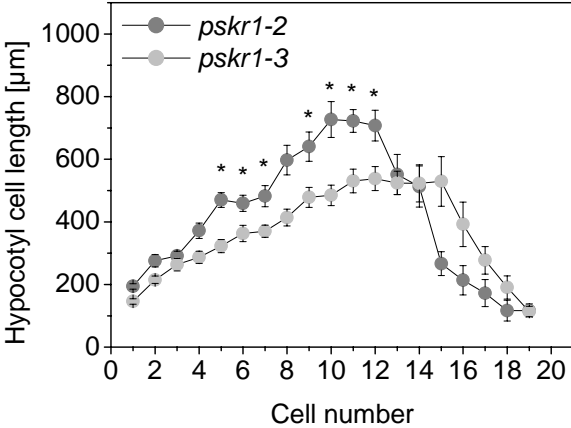

Supplement: pone.0021054.s001.pdf [file pone.0021054.s001.pdf]
